# Supplementary material for: A Democratic Method and Index to Rationalize Authorship Decisions and Determine the Order of Authors
Source: Preprints.org preprint supplement (doi:10.20944/preprints201810.0181.v1), 2018-10-09
Supplement: Supplementary file 1 [file supplementary]

## Sheet: Tabelle1
		contributions of authors to category (in %)				category
		Author A	Author B	Author C	...	importance
	Project Idea	45	35	20	...	20			100
	Experiments X	10	70	20	...	10			100
	Experiments Y	35	35	30		10			100
category	Data Analysis	80	10	10		30			100
	Simulations	0	100	0		15			100
	...								0
	Paper writing	20	20	60		15			100
	Contribution score	40.5	38.5	21	...	100	sum
		contributions of authors to category (in %)
		Author A	Author B	Author C		importance of category
	Project Idea	40	40	20		25
	Experiments X	10	70	20		5
	Experiments Y	35	35	30		10
	Data Analysis	90	10	0		25
	Simulations	0	100	0		20
	...
	Paper writing	20	20	60		15
	Total contribution	39.5	42.5	18	100	100

## Sheet: for figure
			Authors (1) and contributions in % (3)						Category		sum = 100 ?		notes
			X	Y	Z	...			weight (4)
	Category (2)	Conception	45	35	20	...	(sum = 100)		25		100		The idea arose from a discussion between A, B and C. A presented the problem, B the experimental implementation...
		Experiment 1	30	60	10	...			45		100
		...	...	...	...	...			...		0
		Paper writing	70	20	10	...			30		100
	contribution score (5)		45.75	41.75	12.5	...	(sum = 100)		(sum = 100)
		Step 6: average over the contribution scores from all matrices
			X	Y	Z
		Matrix Author A	45.75	41.75	12.5		100
		Matrix Author B	38	47	15		100
		Matrix Author C	40	46	14		100
		average contr. score	41.25	44.9167	13.8333		100
